# Supplementary material
Source: Springer Nature journal article supplement (https://www.springermedizin.de/resource/supplementary/12884_2011_567_MOESM2_ESM.pdf/9457770)
Supplement: MOESM2 [file 9457770]

**Table 3 - Bivariate and Multivariate analysis of factors associated with institutional delivery service utilization among mothers who gave birth in the last 12 months in Munesa woreda, April- 2011.**

| Variables                                  | Institutional delivery |     | COR(95%CI)       | AOR(95%CI)       |
|--------------------------------------------|------------------------|-----|------------------|------------------|
|                                            | Yes                    | No  |                  |                  |
| <b>Place of residence</b>                  |                        |     |                  |                  |
| Urban                                      | 26                     | 90  | 2.41(1.47,3.96)  | 2.27(1.17,4.40)  |
| Rural                                      | 79                     | 660 | 1                | 1                |
| <b>Distance from health institution</b>    |                        |     |                  |                  |
| ≤30minute                                  | 27                     | 109 | 2.04(1.26,3.30)  | *                |
| >30minute                                  | 78                     | 641 | 1                |                  |
| <b>Age of the mother</b>                   |                        |     |                  |                  |
| <20                                        | 15                     | 35  | 14.04(4.38,44.9) | 6.06(1.54,23.78) |
| 20-34                                      | 86                     | 584 | 4.80(1.74,13.39) | 4.02(1.34,12.06) |
| 35+                                        | 4                      | 131 | 1                | 1                |
| <b>Possession of Radio or TV</b>           |                        |     |                  |                  |
| Yes                                        | 79                     | 550 | 1.10(0.69,1.77)  | *                |
| No                                         | 26                     | 200 | 1                |                  |
| <b>Occupational status of the mother</b>   |                        |     |                  |                  |
| House wife                                 | 88                     | 658 | 1                | *                |
| Government employee                        | 4                      | 8   | 3.74(1.10,12.67) |                  |
| Farmer                                     | 13                     | 84  | 1.16(0.62,2.16)  |                  |
| <b>Family size</b>                         |                        |     |                  |                  |
| ≤5                                         | 72                     | 340 | 2.63(1.70,4.07)  | *                |
| >5                                         | 33                     | 410 | 1                |                  |
| <b>Educational status of the mothers</b>   |                        |     |                  |                  |
| Unable to read and write                   | 50                     | 477 | 1                | 1                |
| Primary education                          | 47                     | 259 | 1.73(1.13,2.65)  | 1.44(0.92,2.24)  |
| Secondary and post secondary               | 8                      | 14  | 5.45(2.18,13.63) | 4.31(1.62,11.46) |
| <b>Occupational status of the husbands</b> |                        |     |                  |                  |
| Farmer                                     | 74                     | 652 | 1                |                  |
| Government employee                        | 7                      | 23  | 2.68(1.11,6.64)  |                  |
| Daily laborer/Merchants                    | 24                     | 75  | 2.82(1.68,4.74)  |                  |
| <b>Educational status of the husbands</b>  |                        |     |                  |                  |
| Unable to read and write                   | 30                     | 294 | 1                | 1                |
| Primary education                          | 59                     | 428 | 1.35(0.85,2.15)  | 0.61(0.36,1.03)  |
| Secondary and post secondary               | 16                     | 28  | 5.60(2.73,11.50) | 2.77(1.07,7.19)  |
| <b>Parity</b>                              |                        |     |                  |                  |
| 1                                          | 35                     | 104 | 4.65(2.61,8.29)  | 2.41(1.17,4.79)  |
| 2-4                                        | 48                     | 342 | 1.94(1.14,3.29)  | 0.99(0.55,1.80)  |
| 5+                                         | 22                     | 304 | 1                | 1                |
| <b>ANC visit during last pregnancy</b>     |                        |     |                  |                  |
| Yes                                        | 74                     | 223 | 5.64(3.61,8.83)  | 4.18(2.54,6.89)  |
| No                                         | 31                     | 527 | 1                | 1                |

\* Not significant in back ward stepwise logistic regression.
